# Supplementary material for: Dietary intervention preserves β cell function in mice through CTCF-mediated transcriptional reprogramming
Source: PubMed Central journal article supplement — J Exp Med. 2022 Jun 2;219(7):e20211779. doi: 10.1084/jem.20211779 (PMC9166293; doi:10.1084/jem.20211779), 2022-06-02

**Fig. 7. CTCF regulates glucose metabolism and stress response related gene expression in murine islets.**

**Fig. 7b**

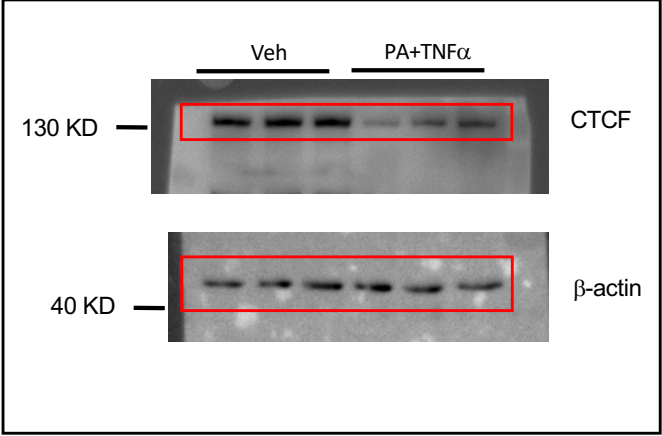

Supplement: JEM_20211779_SourceDataF7.pdf [file JEM_20211779_SourceDataF7.pdf]
