# Supplementary material for: Dietary intervention preserves β cell function in mice through CTCF-mediated transcriptional reprogramming
Source: PubMed Central journal article supplement — J Exp Med. 2022 Jun 2;219(7):e20211779. doi: 10.1084/jem.20211779 (PMC9166293; doi:10.1084/jem.20211779), 2022-06-02

**Fig. S4. GO analysis of unaltered genes in ATAC-Seq and effects of AAV-mediated overexpression of CTCF, Foxa2, and Pdx1 on islet insulin secretion.**

**Fig. S4b**

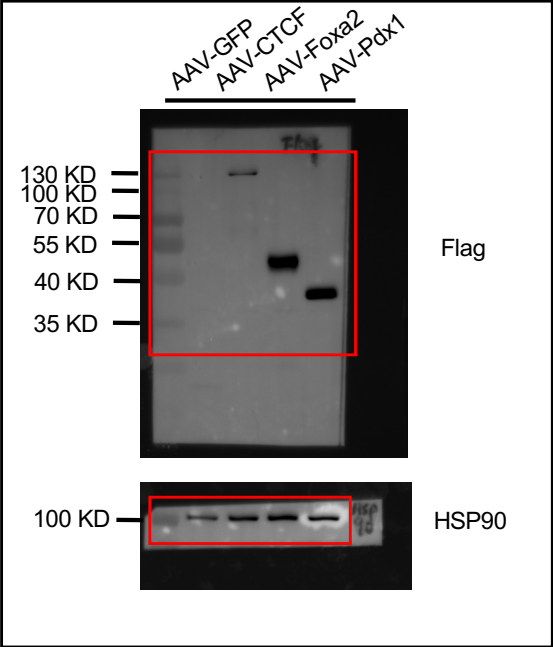

Supplement: JEM_20211779_SourceDataFS4.pdf [file JEM_20211779_SourceDataFS4.pdf]
