# Supplementary material for: Dietary intervention preserves β cell function in mice through CTCF-mediated transcriptional reprogramming
Source: PubMed Central journal article supplement — J Exp Med. 2022 Jun 2;219(7):e20211779. doi: 10.1084/jem.20211779 (PMC9166293; doi:10.1084/jem.20211779), 2022-06-02

**Fig. S5. Regulation of CTCF expression, its effect on islet function, and CUT&Tag analysis of CTCF genome-wide binding profiles.**

**Fig. S5a**

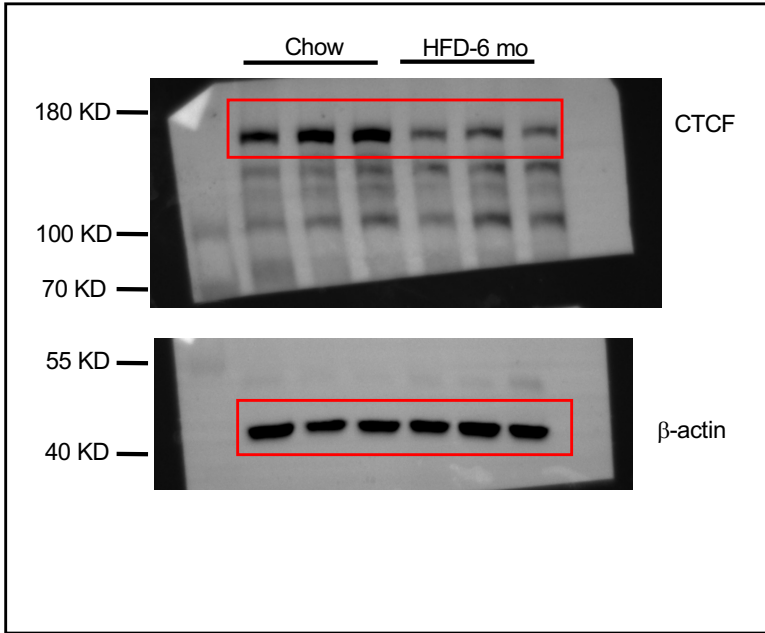

**Fig. S5b**

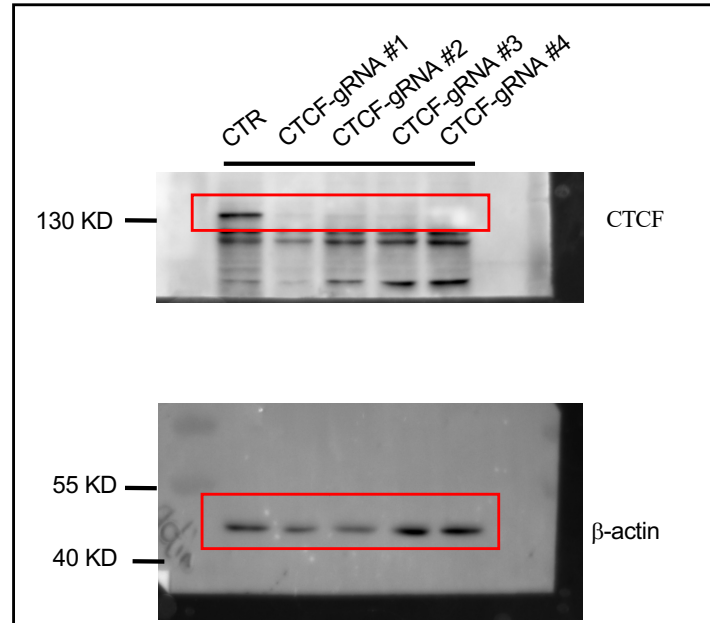

**Fig. S5c**

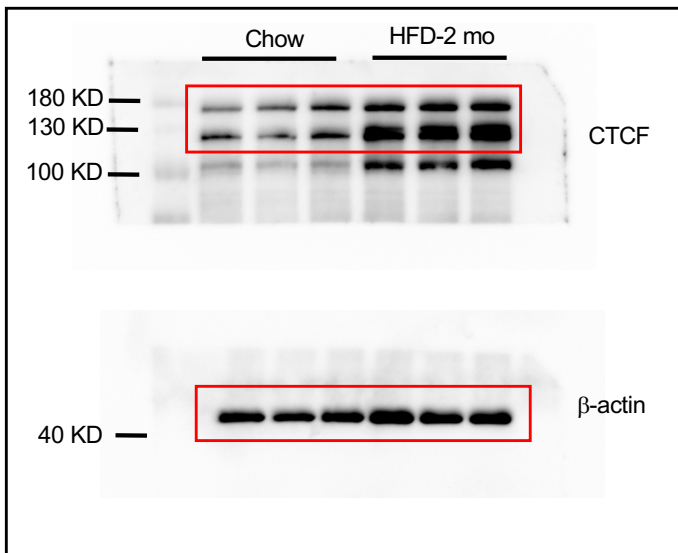

Supplement: JEM_20211779_SourceDataFS5.pdf [file JEM_20211779_SourceDataFS5.pdf]
